# Supplementary material for: Fabrication of functional bioinorganic nanoconstructs by polymer–silica wrapping of individual myoglobin molecules
Source: Royal Society of Chemistry journal article supplement (doi:10.1039/c0nr00576b), 2010-12-10
Supplement: c0nr00576b.pdf [file c0nr00576b.pdf]

NR-ART-08-2010-000576

## Fabrication of functional bioinorganic nanoconstructs by polymer-silica wrapping of individual myoglobin molecules

Biru Hu, Mei Li, Sanjani Sadasivan, Avinash J. Patil, Stephen Mann

### Supporting Information:

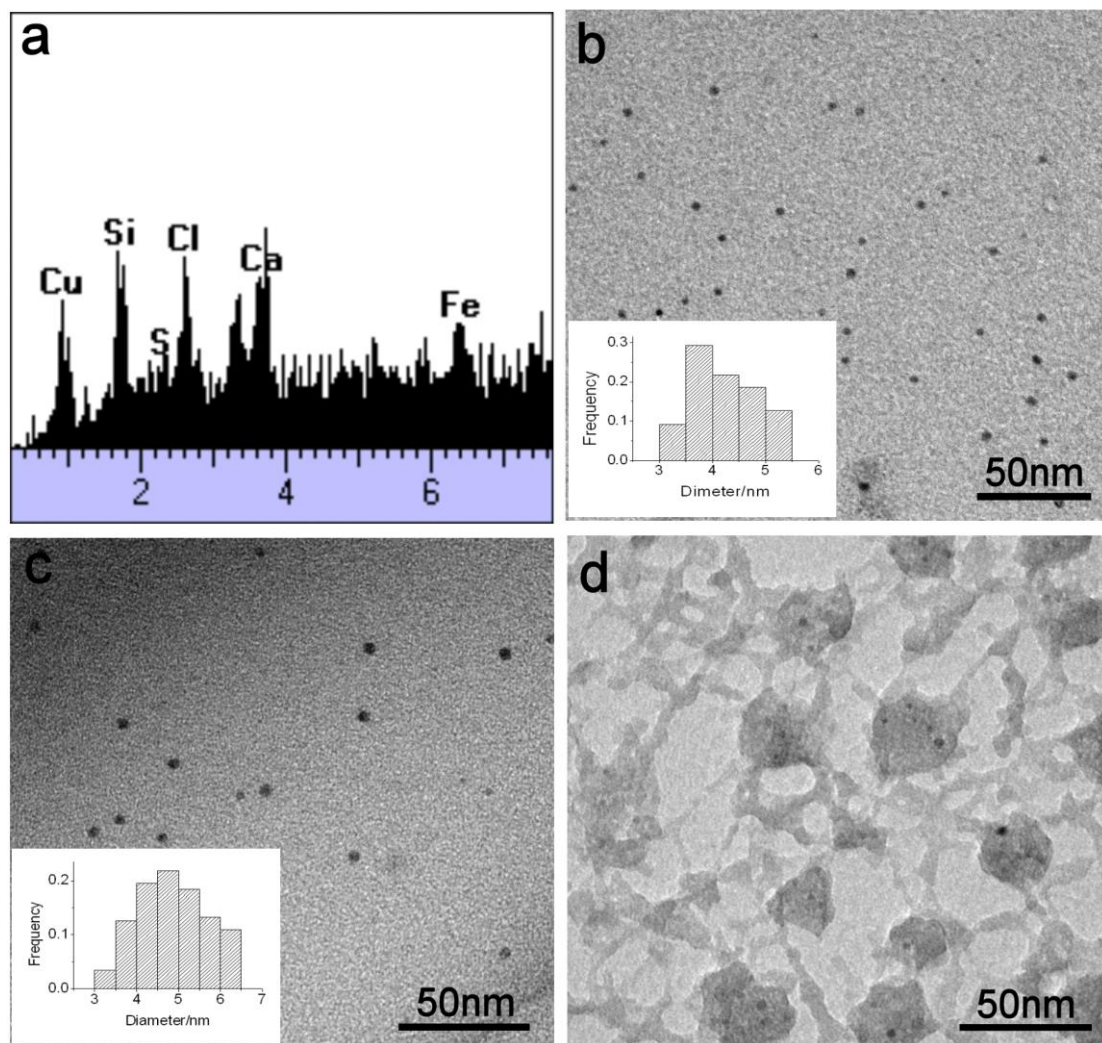

**Figure S1** (a) EDX analysis for met-Mb/P123/SiO<sub>2</sub> nanoparticles redispersed in water; (b,c) TEM images and histograms (insets) of met-Mb/P123/SiO<sub>2</sub> nanoparticles prepared in cyclohexane at a molar ratio of (b) Mb : P123 = 1 : 50, and (c) Mb : TMOS = 1 : 90. (d) silica network formed at a Mb : TMOS molar ratio of 1 : 120.

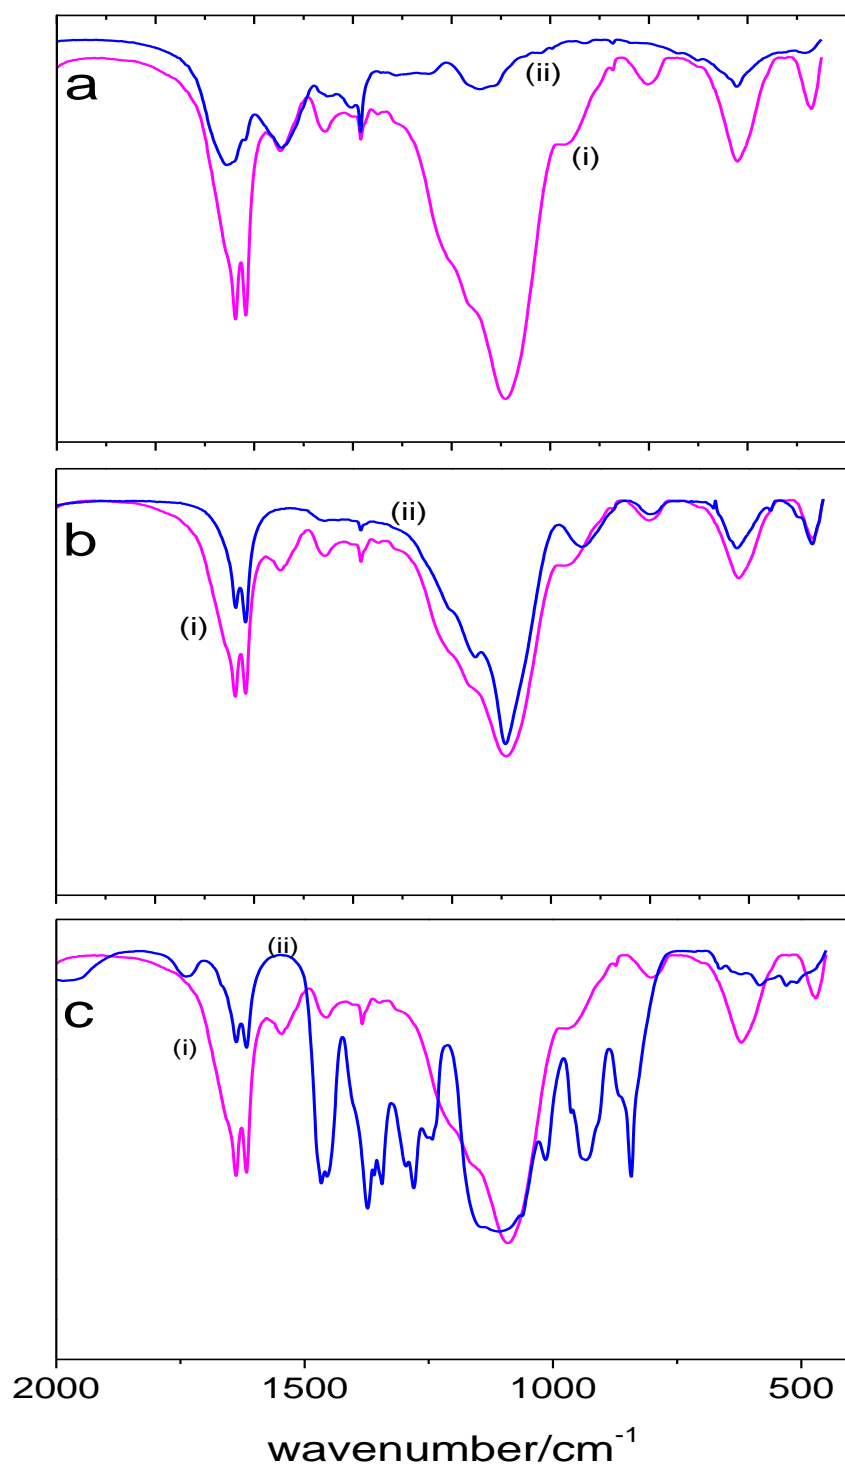

**Figure S2a.** FTIR spectra of (a) met-Mb/P123/SiO<sub>2</sub> nanoparticles (i) and native met-Mb (ii), (b) met-Mb/P123/SiO<sub>2</sub> nanoparticles (i) and silica (ii), (c) met-Mb/P123/SiO<sub>2</sub> nanoparticles (i) and P123 (ii).

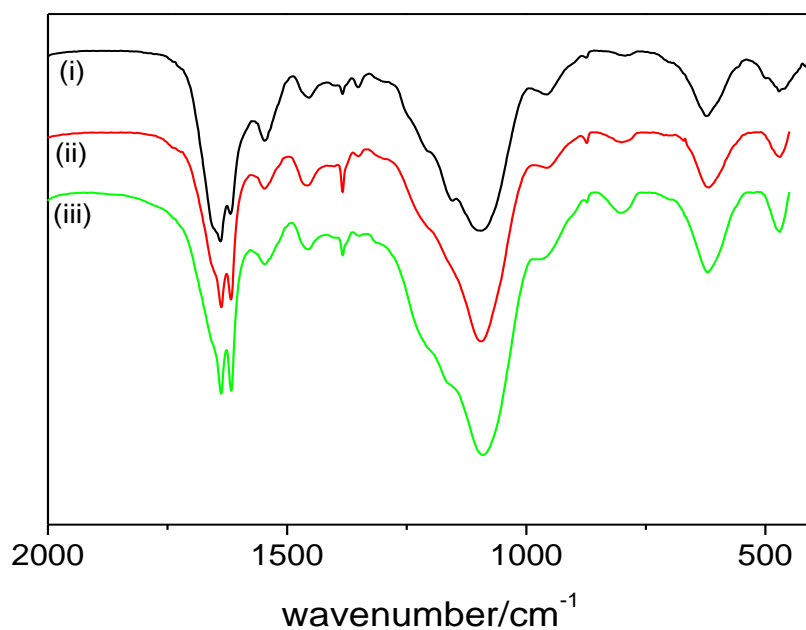

**Figure S2b** : FTIR spectra of met-Mb/P123/SiO<sub>2</sub> nanoparticles at different molar ratios of Mb : P123 : TMOS; (i) 1:10:15 (ii) 1:20:15 (iii) 1:50:15.

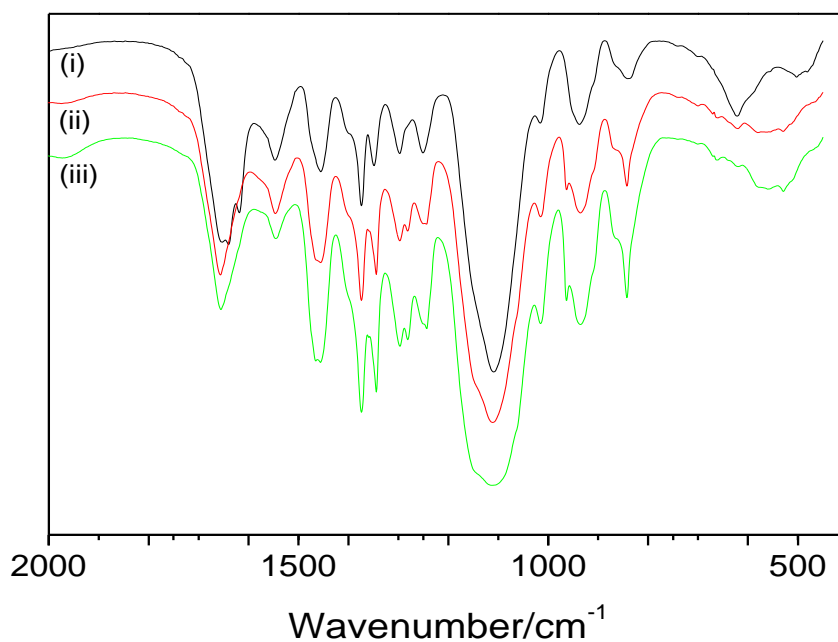

**Figure S2c** : FTIR spectra of Mb/P123 at different molar ratio of Mb : P123 (i) 1:10 (ii) 1:20 (iii) 1:50.

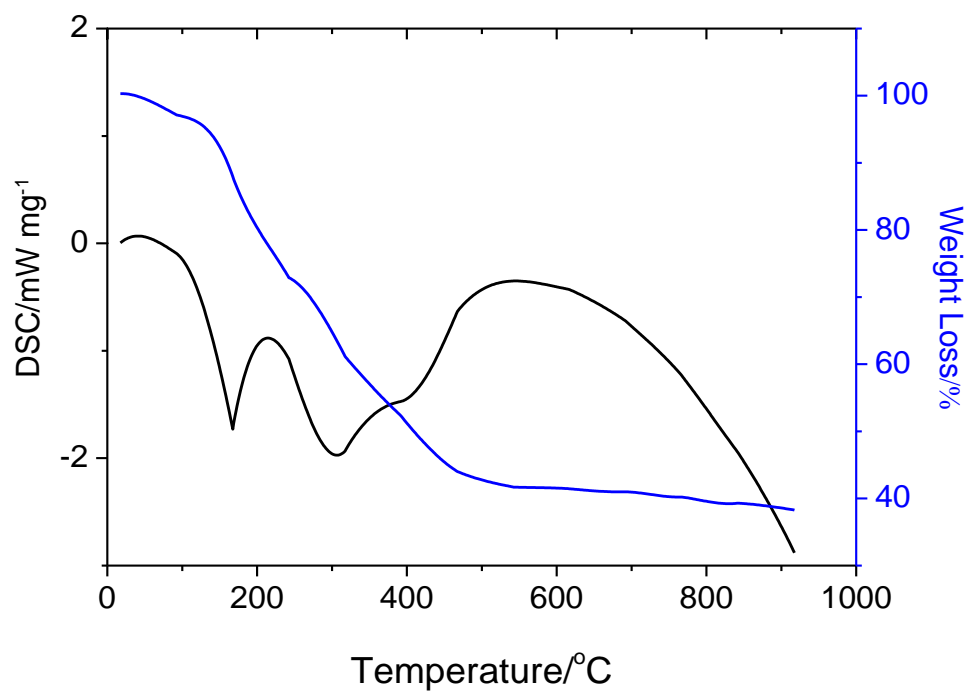

**Figure S3:** TGA and DSC profiles of met-Mb/P123/silica nanoparticles.

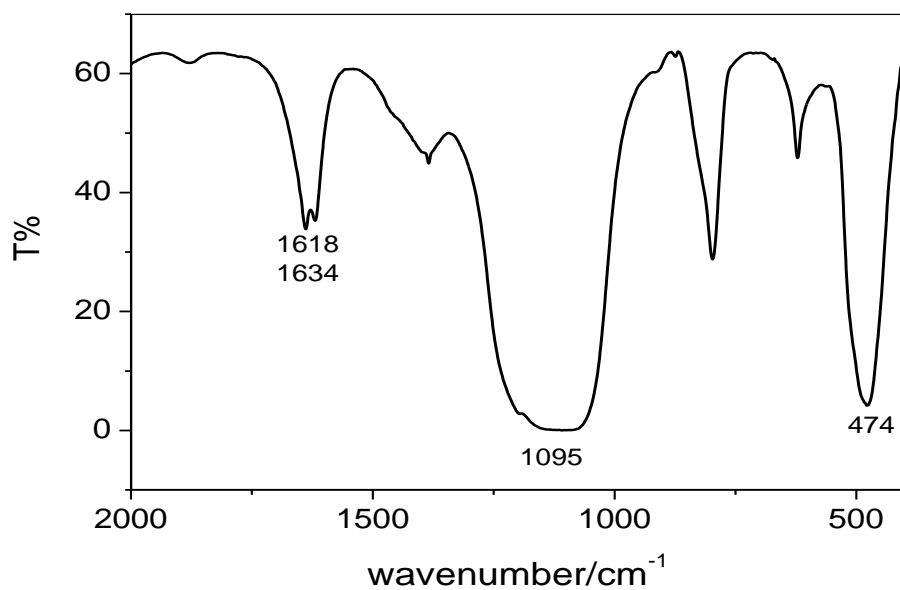

**Figure S4:** FTIR spectrum of residual mass after TGA analysis of met-Mb/P123/silica nanoparticles

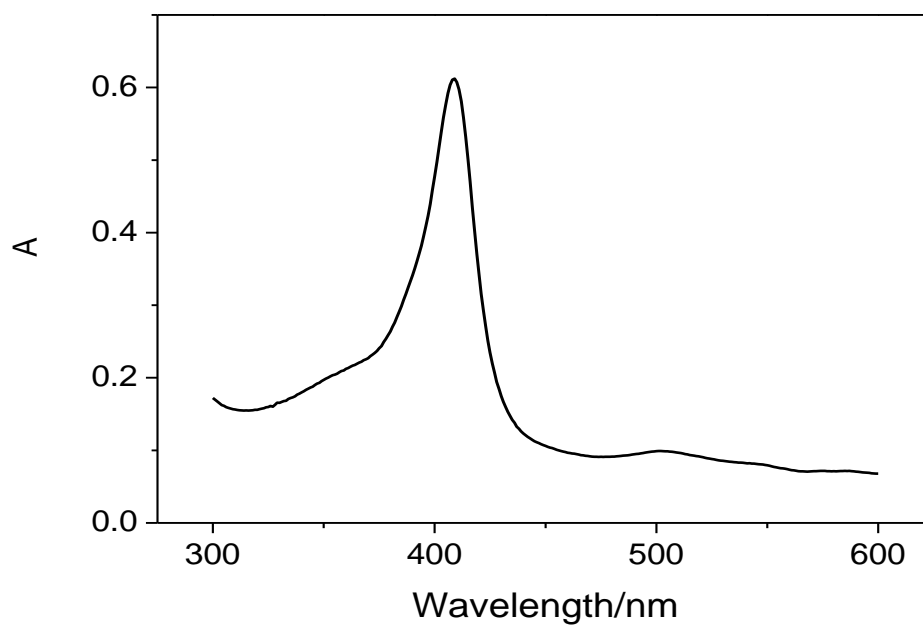

**Figure S5.** UV-Vis spectra of met-Mb/P123/silica nanoparticles redispersed in water .

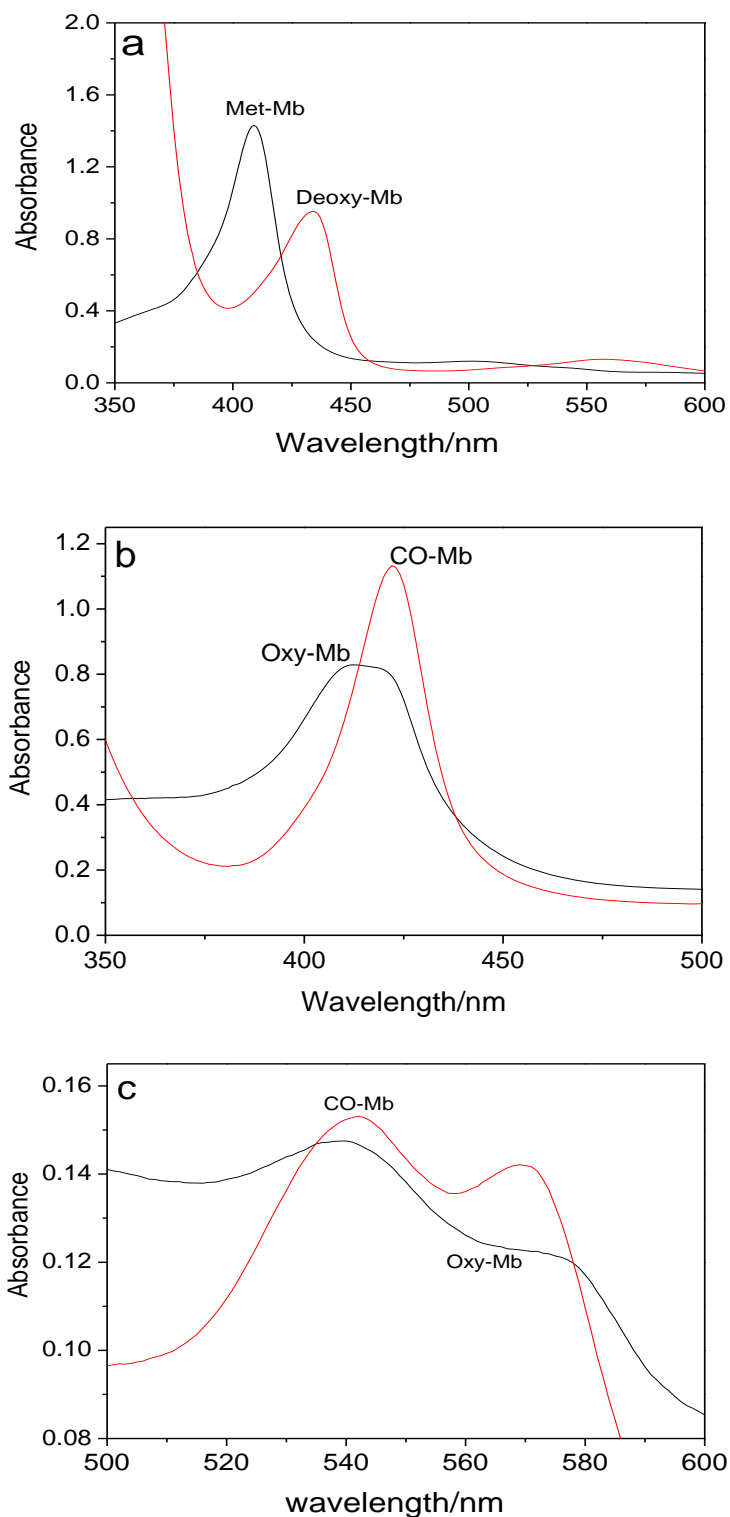

**Figure S6.** UV-vis spectra of (a) native met-Mb(FeIII) and deoxy-Mb(FeII) (b) CO-binding to native Mb and O<sub>2</sub>-binding to CO-deoxyMb. (c) enlarged section of (b) at 500 -600 nm.

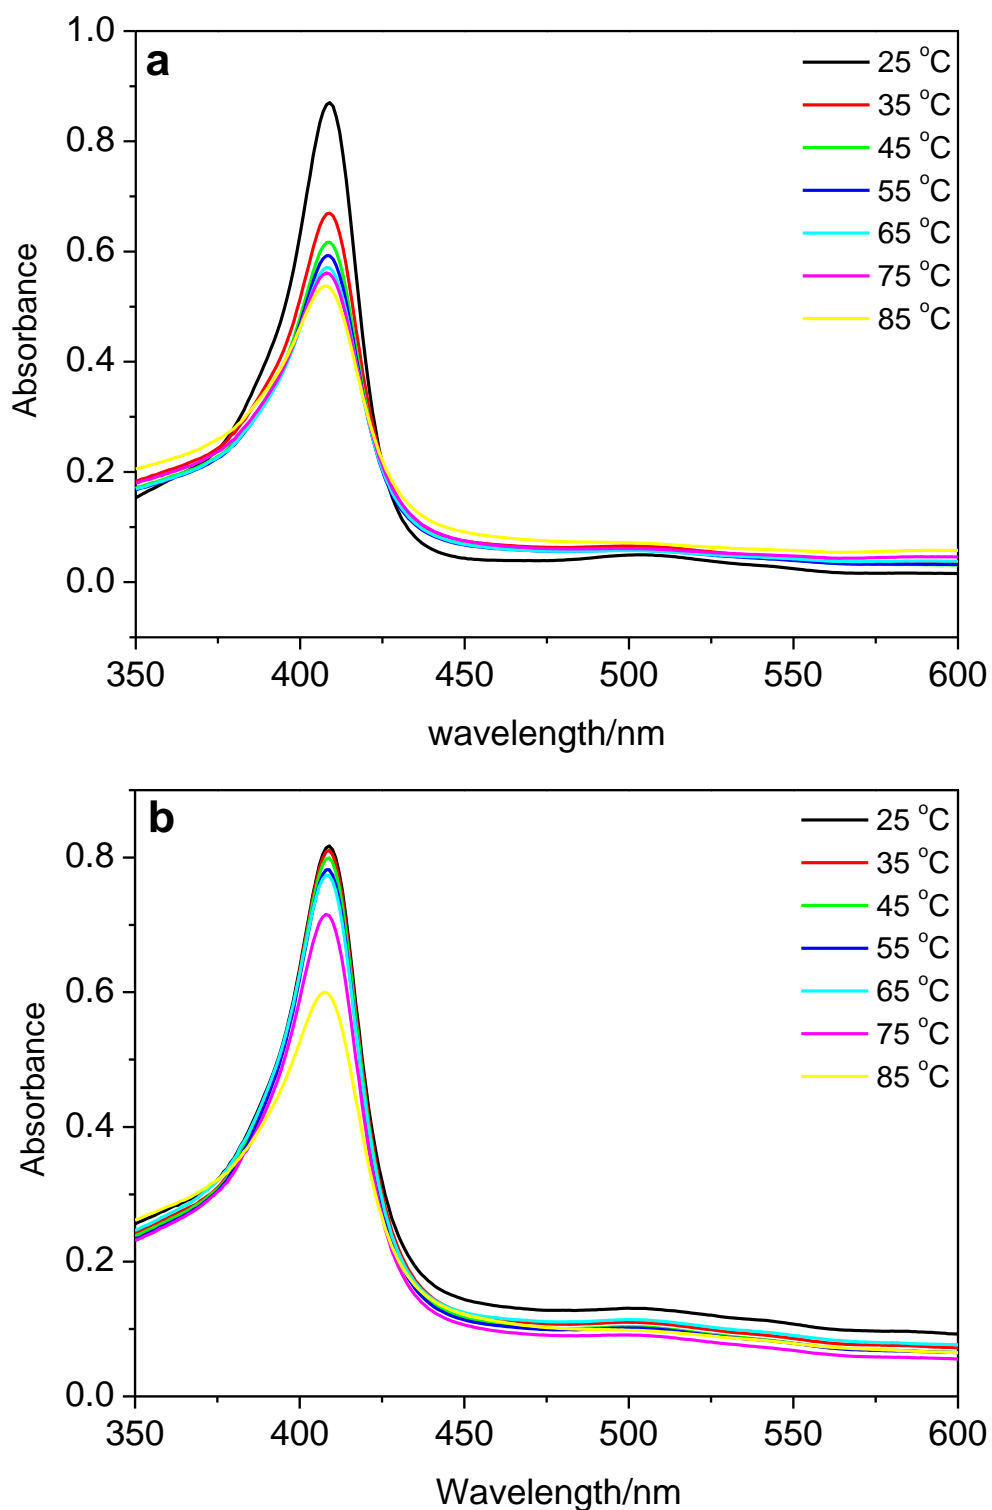

**Figure S7.** UV spectra of (a) native met-Mb in water, and (b) met-Mb/P123/silica nanoparticles in water at different temperatures.

**Table S1: Summary of DLS data**

All DLS data were determined from the size distribution by volume.

P123/oil:  $d = 7.7\text{-}13.4\text{nm}$ .

P123/oil/TMOS, silica nanoparticles;  $d = 12.8\text{nm}$

|                                                        | Hydrodynamic diameter<br>(d, nm) | Diameter/nm(TEM)                       |
|--------------------------------------------------------|----------------------------------|----------------------------------------|
| Mb-H <sub>2</sub> O                                    | 3.6                              |                                        |
| P123+ oil                                              | 7.7-13.4                         | aggregate 40-100nm<br>individual 2.5nm |
| P123 + oil + TMOS                                      | 263 nm                           | 19 nm                                  |
| MB+p123+oil                                            | 3.6 nm                           |                                        |
| nanoconstructs/oil(Mb+P123+oil<br>+ TMOS )<br>≈1:10:15 | 8.5 nm                           | ≈4.0nm                                 |
| Nanoconstructs/oil<br>(Mb:P123:TMOS ≈1: 50:15)         |                                  | ≈4.0nm                                 |
| Nanoconstructs/oil<br>(Mb:P123:TMOS =1: 10: 90)        |                                  | ≈4.9nm                                 |
| Mb+P123+oil + TMOS<br>≈1:10:75                         | 15.6 nm                          |                                        |
| Nanoconstructs/water<br>( Mb:p123:TMOS=1:10:15 )       | 12.8 nm                          | ≈4.0nm                                 |
